# Supplementary material
Source: PubMed Central journal article supplement (PMC4714946)
Supplement: NIHMS746904-supplement-SUPP.pdf [file NIHMS746904-supplement-SUPP.pdf]

*Supplementary Material*

## **Rationally Engineered Cas9 Nucleases with Improved Specificity**

Ian M. Slaymaker<sup>1,2,3,4\*</sup>, Linyi Gao<sup>1,4\*</sup>, Bernd Zetsche<sup>1,2,3,4</sup>, David A. Scott<sup>1,2,3,4</sup>,  
Winston X. Yan<sup>1,5,6</sup>, and Feng Zhang<sup>1,2,3,4,7†</sup>

<sup>1</sup>Broad Institute of MIT and Harvard  
Cambridge, MA 02142, USA

<sup>2</sup>McGovern Institute for Brain Research  
<sup>3</sup>Department of Brain and Cognitive Sciences  
<sup>4</sup>Department of Biological Engineering  
Massachusetts Institute of Technology  
Cambridge, MA 02139, USA

<sup>5</sup>Graduate Program in Biophysics  
<sup>6</sup>Harvard-MIT Division of Health Sciences and Technology  
Harvard Medical School  
Boston, Massachusetts 02115, USA

\* These authors contributed equally to this work.

† Correspondence should be addressed to [zhang@broadinstitute.org](mailto:zhang@broadinstitute.org) (F.Z.).

## SUPPLEMENTARY MATERIALS AND METHODS

### *Structural analysis*

Structures of SpCas9 (PDB ID 4UN3 and 4OO8) were analyzed using Pymol (Schrödinger). DNA was hand modeled into the non-complementary strand groove (nt-groove) with the phosphate backbone making hydrogen bond distance contacts with specificity conferring mutations when possible. Electrostatics were calculated using the APBS plugin as part of Pymol. Amino acid sequences were visualized using Geneious 2 (Geneious version (8.0.3) ([www.geneious.com](http://www.geneious.com))(1)).

### *Cloning*

Mutants were cloned using the Golden Gate strategy (2). Briefly, wild-type SpCas9 (pX330) or wild-type SaCas9 (pX601) were used as template to amplify two PCR fragments, using primers that incorporated BsaI (pX330) or BbsI (pX601) restriction sites. BsaI or BbsI digestion results in distinct 5' overhangs which are either compatible to the AgeI or EcoRI overhangs of the recipient vector or will reconstitute the desired point mutation at the junction of the two Cas9 DNA pieces.

### *Cell culture and transfections*

Human embryonic kidney (HEK) cell lines 293T and 293FT (Fisher Scientific) were maintained in Dulbecco's modified Eagle's medium DMEM (Life technologies) supplemented with 10% fetal bovine serum (Gibco) at 37°C with 5% CO<sub>2</sub>. Cells were plated one day prior to transfection in 24- or 96-well plates (Corning) at a density of approximately 120,000 cells per 24-well or 30,000 cells per 96-well. Transfections were performed with Lipofectamine 2000 (Life Technologies) according to the manufacturer's recommended protocol. Unless otherwise specified, cells were transfected with a total of 400ng of Cas9 plasmid with 100-200ng sgRNA plasmid per 24-well, or 100ng Cas9 with 25-50ng sgRNA plasmid per 96-well. For each transfection, an equal amount of plasmid was delivered to all samples. For cytotoxicity experiments, HEK293T cells were transfected with WT or eSpCas9(1.1) and incubated for 72 hours before measuring cell survival using the CellTiter-Glo (Promega) viability assay, which fluoresces in response ATP production by live cells.

### *Indel analysis by next-generation sequencing (NGS)*

Cells were harvested approximately 3 days post transfection. Genomic DNA was extracted using a QuickExtract DNA extraction kit (Epicentre) by resuspending pelleted cells in QuickExtract (80µL per 24-well, or 20µL per 96-well), followed by incubation at 65°C for 15min, 68°C for 15min and 98°C for 10-15min. PCR fragments for targeted deep sequencing were generated in two step PCR reactions as previously described (3). Briefly, primers with PCR handles for second round amplification were used to amplify genomic regions of interest (table.S2), followed by a fusion PCR method to attach Illumina P5 adapters as well as unique sample-specific barcodes to the first round PCR product.

## *BLESS*

Cells were harvested at approximately 24 hr post-transfection, and BLESS was carried out as described previously (4, 5). Briefly, a total of 10 million cells were fixed for nuclei isolation and permeabilization and then treated with Proteinase K for 4 min at 37 °C before inactivation with PMSF. Deproteinated nuclei DSBs were labeled with 200 mM of annealed proximal linkers overnight. After Proteinase K digestion of labeled nuclei, chromatin was mechanically sheared with a 26G needle before sonication (BioRuptor, 20 min on high, 50% duty cycle). A total of 20 µg of sheared chromatin was captured on streptavidin beads, washed, and ligated to 200 mM of distal linker. Linker hairpins were then cleaved off with I-SceI digestion for 4 h at 37 °C, and products were PCR-enriched for 18 cycles before proceeding to library preparation with a TruSeq Nano LT Kit (Illumina). For the negative control, cells were mock transfected with Lipofectamine 2000 and pUC19 DNA and were parallel processed through the assay.

The calculation of the DSB score to separate the background DSBs from the bona fide Cas9-induced ones was done as previously described (Ran et al, Nature 2015), and sorting the loci on the DSB score revealed the top off-target sites as had been previously identified for these sgRNA targets. In order to provide additional detection capability beyond these top off-targets, we found from the previous Cas9-BLESS data that a homology-search algorithm could help further identify true Cas9-induced DSBs. The homology-search algorithm searched for the best matched guide sequence within a region of the genome 50nt on either side of the median of a DSB cluster identified in BLESS for all NGG and NAG PAM sequences. A score based on the homology was calculated with the following weights: a match between the sgRNA and the genomic sequence scores +3, a mismatch is -1, while an insertion or deletion between the sgRNA and genomic sequence costs -5. Thereby, an on-target sequence with the full 20bp guide + PAM would score 69. The final homology score for a DSB cluster was identified as the maximum of the scores from all possible sequences. Using these weights, we empirically found that bona fide off-targets (for which indels were identified on targeted deep sequencing) and background DSBs were separated fully when a threshold of >50 was used for the homology score. Using this homology criterion on the top 200 BLESS DSB loci allowed us to further identify off-targets from the background DSBs.

## SUPPLEMENTARY FIGURES

**Figure S1**

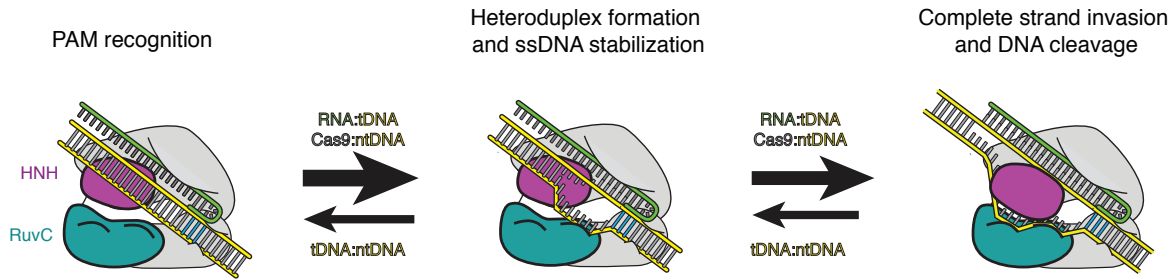

**Fig. S1. Schematic sgRNA guided targeting and DNA unwinding.**

Cas9 cleaves target DNA in a series of coordinated steps. First, the PAM-interacting domain recognizes an NGG sequence 5' of the target DNA. After PAM binding, the first 10-12 nucleotides of the target sequence (seed sequence) are sampled for sgRNA:DNA complementarity, a process dependent on DNA duplex separation. If the seed sequence nucleotides complement the sgRNA, the remainder of DNA is unwound and the full length of sgRNA hybridizes with the target DNA strand. We hypothesized the nt-groove between the RuvC (teal) and HNH (magenta) domains stabilizes the non-targeted DNA strand (ntDNA) and facilitates unwinding through non-specific interactions with negative charges of the DNA phosphate backbone. In this model, RNA:target-strand DNA (tDNA) and Cas9:ntDNA interactions drive DNA unwinding (top arrow) in competition against tDNA:ntDNA rehybridization (bottom arrow).

**Figure S2**

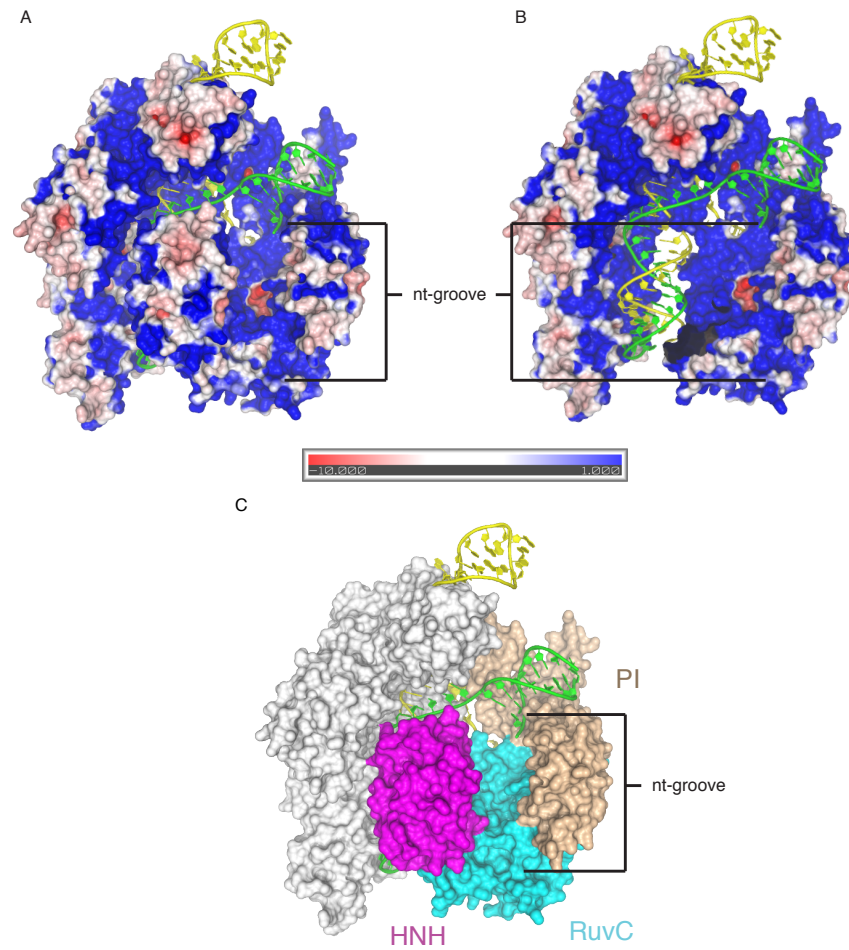

**Fig S2. Electrostatics of SpCas9 reveal non-target strand groove.**

(A) Crystal structure (4UN3) of SpCas9 paired with sgRNA and target DNA colored by electrostatic potential to highlight positively charged regions. Scale is from -10 to 1 keV. (B) Identical to panel (A) with HNH domain removed to reveal the sgRNA:DNA heteroduplex. (C) Crystal structure (in the same orientation as (A)) colored by domain: HNH (magenta), RuvC (teal), and PAM-interacting (PI) (beige).

**Figure S3**

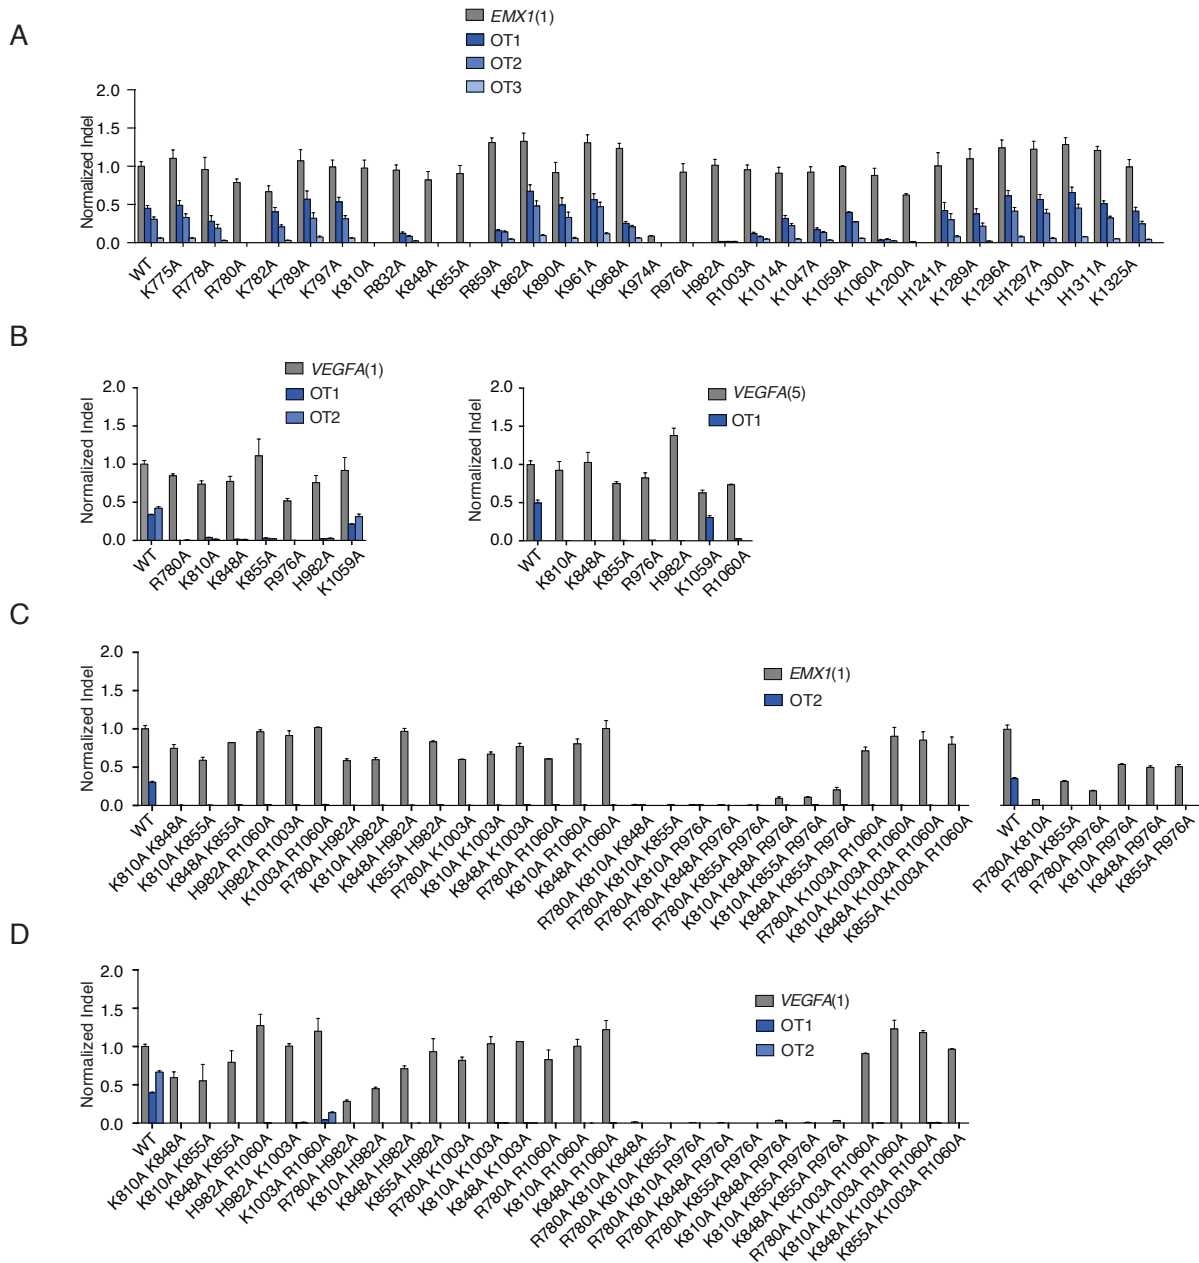

**Fig S3. Off-target analysis of generated mutants.**

Thirty-one SpCas9 single amino acid mutants were generated and tested for specificity at (A) an *EMX1* target site and (B) two *VEGFA* target sites. Mutants combining the top residues that improved specificity were further tested at (C) *EMX1* and (D) *VEGFA*.

Figure S4

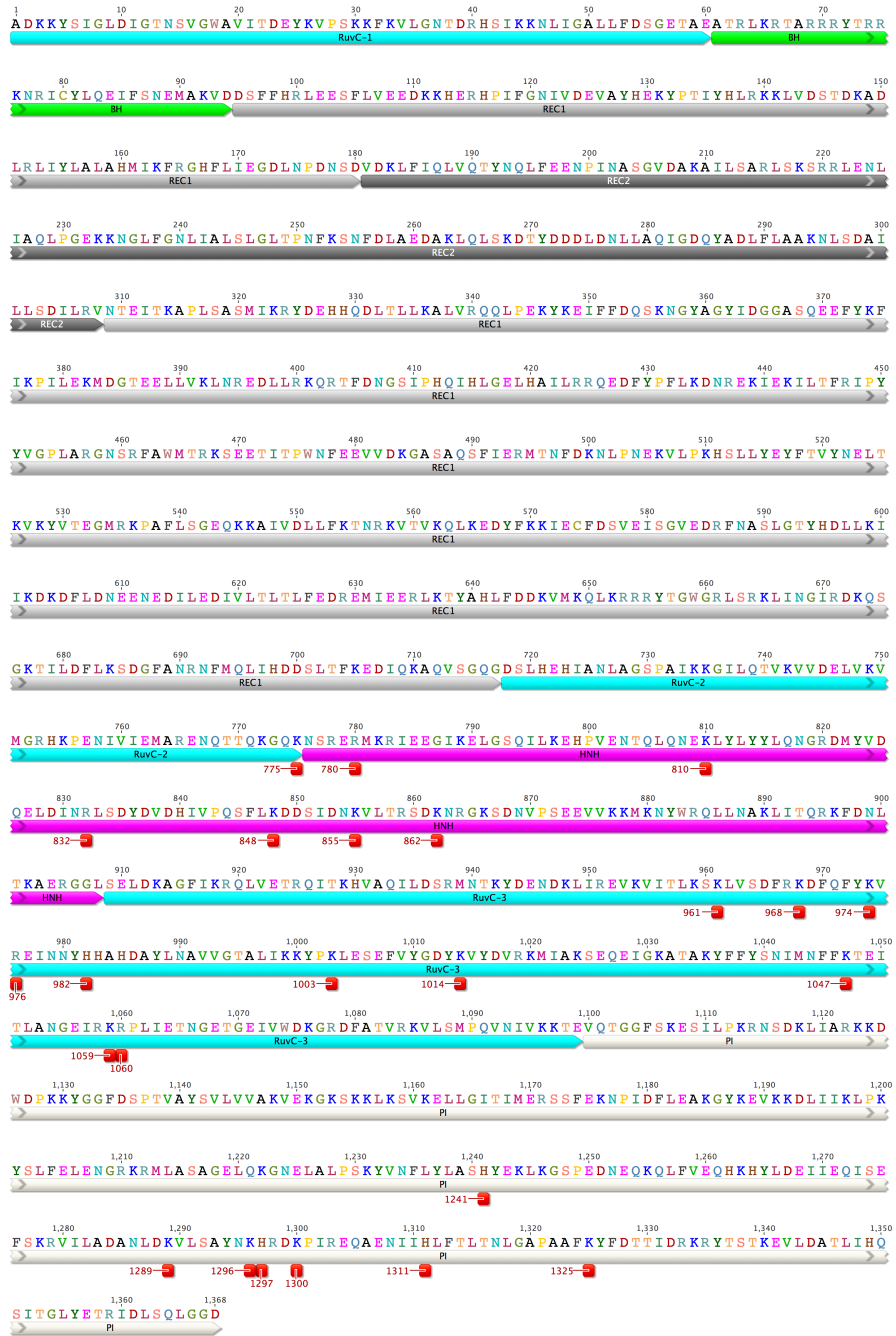

Fig. S4. Annotated SpCas9 amino acid sequence.

Mutations of SpCas9 that altered non-targeted strand groove charges were primarily in the RuvC and HNH domains (highlighted in yellow). RuvC (cyan), bridge helix (BH, green), REC (grey), HNH (magenta), and PI (beige) domains are annotated as in Nishmasu et al. (6).

**Figure S5**

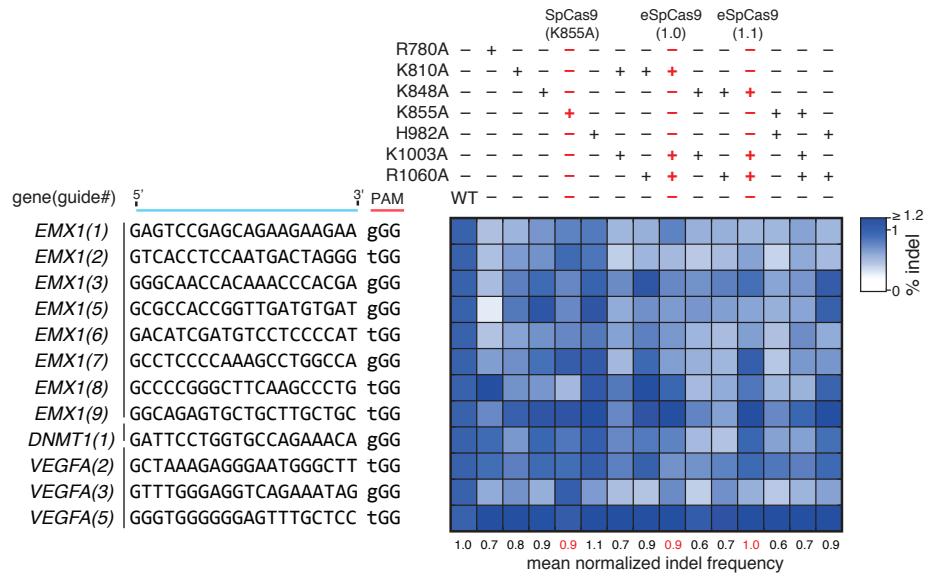

**Fig. S5. On-target efficiency screen of SpCas9 mutants.**

Screen of top single amino acid mutants and combination mutants at 10 target loci for on-target cleavage efficiency. SpCas9 (K855A), eSpCas9(1.0), and eSpCas9(1.1) are highlighted in red.



**Figure S6**

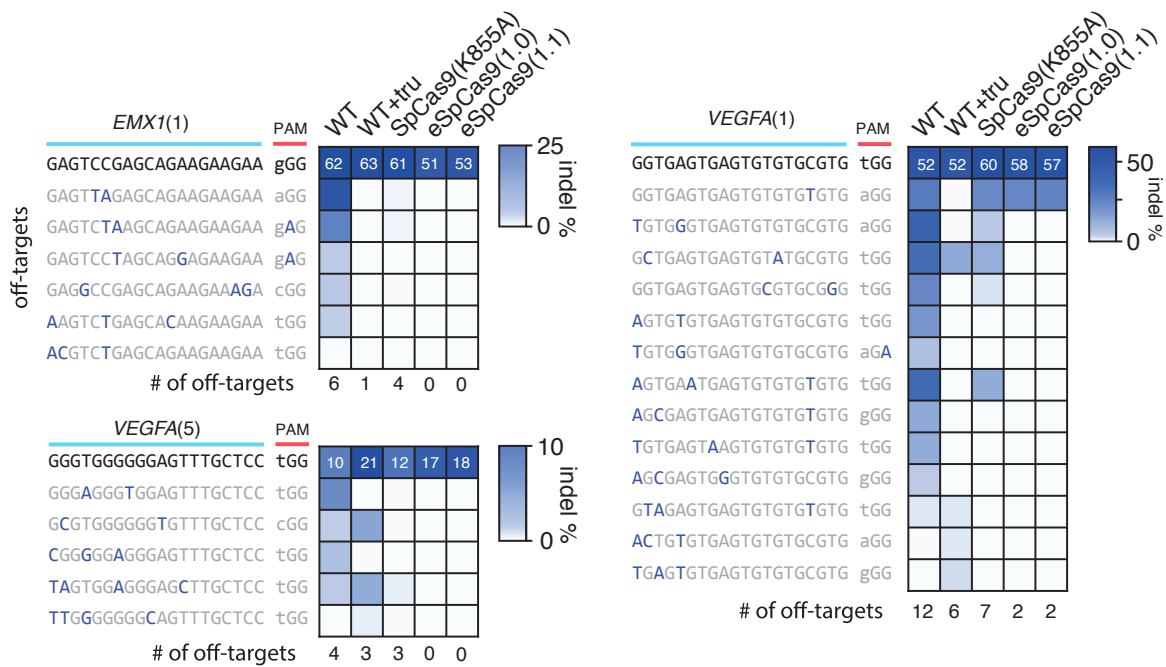

**Fig. S6. eSpCas9(1.0) and eSpCas9(1.1) outperforms truncated sgRNAs as a strategy for improving specificity.**

Comparison of the specificity of SpCas9(K855A), eSpCas9(1.0) and eSpCas9(1.1) with truncated sgRNAs (tru). Indel frequencies at three loci (*EMX1*(1), *VEGFA*(1) and *VEGFA*(5)) were tested at major annotated off-target sites. For both *VEGFA* target sites, tru-sgRNAs increased indel frequency at some off-target sites and generated indels at off-targets not observed for WT SpCas9. On target indel percentages are labeled in white. The number of off-target sites detectable by targeted deep sequencing for each SpCas9 mutant are listed below the heat map (>0.2% indel).

**Figure S7**

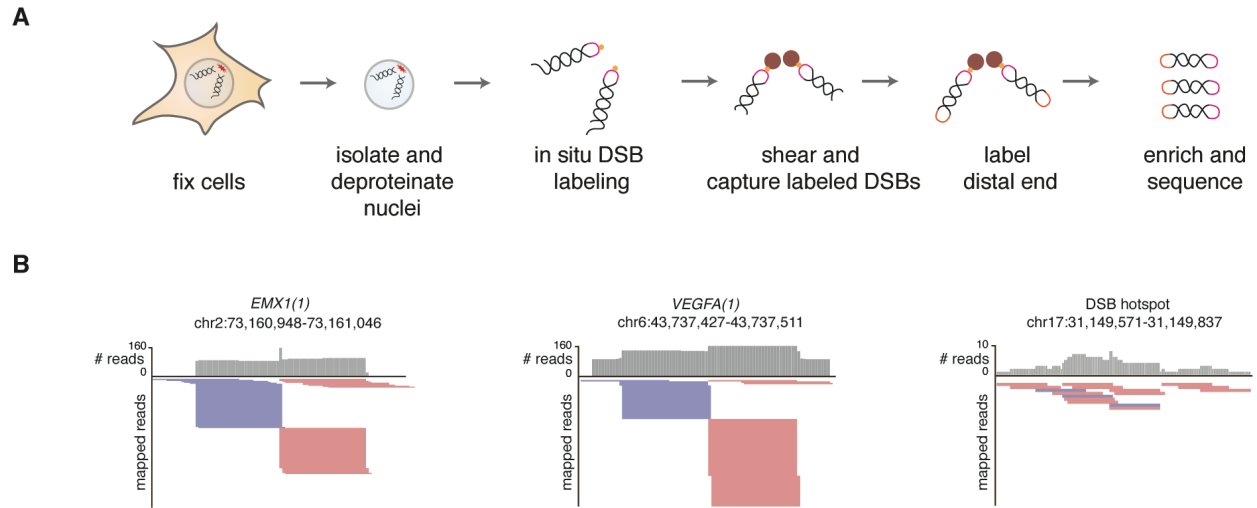

**Fig. S7. Diagram of BLESS workflow and reads mapped to an on-target cut site.**

(A) Schematic outline of the BLESS workflow. (B) Representative BLESS sequencing for forward (red) and reverse (blue) reads mapped to the genome. Reads mapping to Cas9 cut sites have distinct shape compared to DSB hotspots.

**Figure S8**

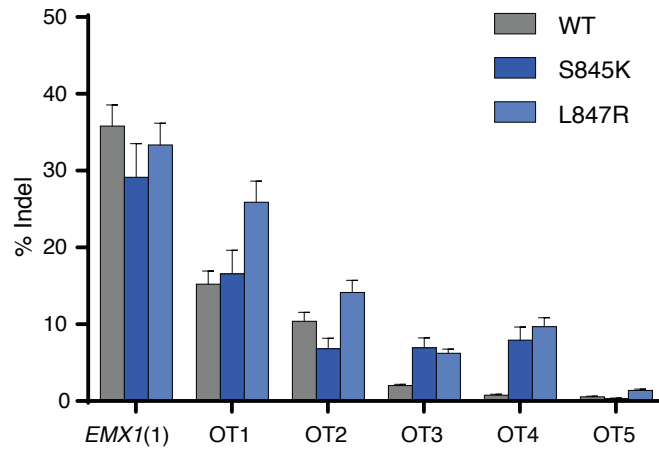

**Fig. S8. Increasing positive charge in the nt-groove generates can result in increased cleavage at off-target sites.**

Single amino acid mutants SpCas9(S845K) and SpCas9(L847R) exhibited less specificity than WT SpCas9 at the *EMX1*(1) target site.

**Figure S9**

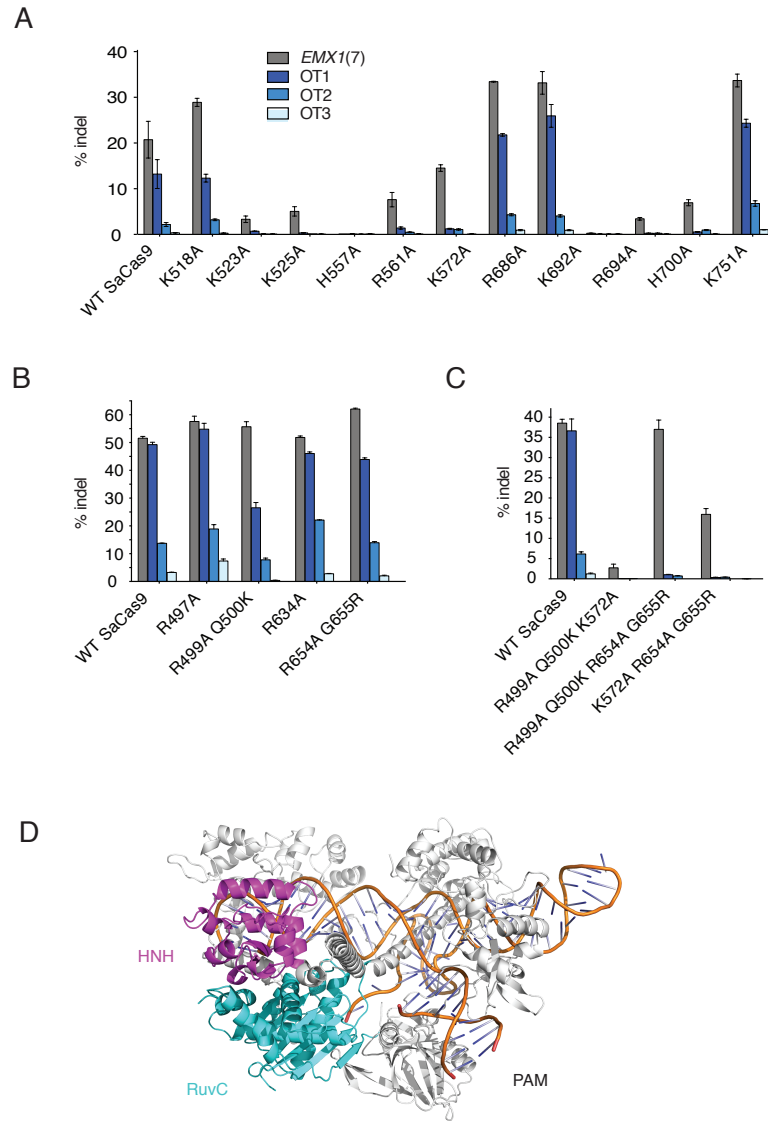

**Fig. S9. Generation of eSaCas9 through mutagenesis of the nt-groove.**

An improved specificity variant of *S. aureus* Cas9 (SaCas9) was generated similarly to eSpCas9. (A,B) Single and double amino acid mutants of residues in the groove between the RuvC and HNH domains were screened for decreased off-target cutting. (C) Mutants with improved specificity were combined to make a variant of SaCas9 that maintained on-target cutting at *EMX1(7)* and had significantly reduced off-target cutting. (D) Crystal structure of SaCas9 showing the groove between the HNH and RuvC domains.

**Figure S10**

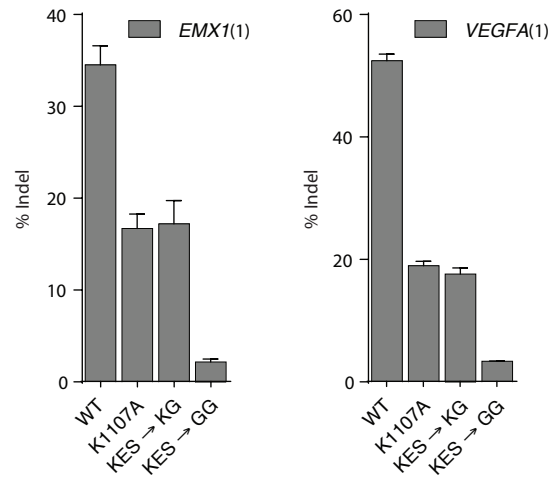

**Fig. S10. Characterization of on-target efficiency for specificity-enhancing mutants identified in Anders et al.**

Anders et al. previously reported three SpCas9 mutants at the phosphate lock loop (Lys1107, Glu1108, Ser1109) in the PI domain which confer specificity to bases 1 and 2 of the sgRNA proximal to the PAM (7). These consisted of a single amino acid mutant (K1107A) and two mutants in which the Lys-Glu-Ser (KES) sequence was replaced with the dipeptides Lys-Gly (KG) and Gly-Gly (GG), respectively. Targeted deep sequencing indicated that these phosphate lock mutants can reduce on-target cleavage efficiency.

**Figure S11**

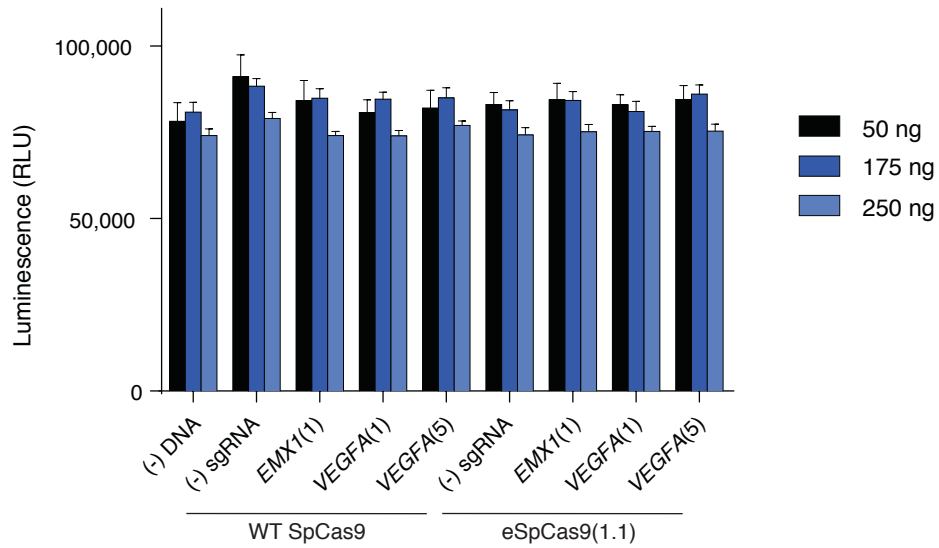

**Fig. S11. eSpCas9(1.1) is not cytotoxic to human cells.**

HEK293T cells were transfected with plasmid encoding WT SpCas9 or eSpCas9(1.1) and incubated for 72 hours before measuring cell survival using the CellTiter-Glo assay, which fluoresces in response ATP production by live cells.

**Figure S12**

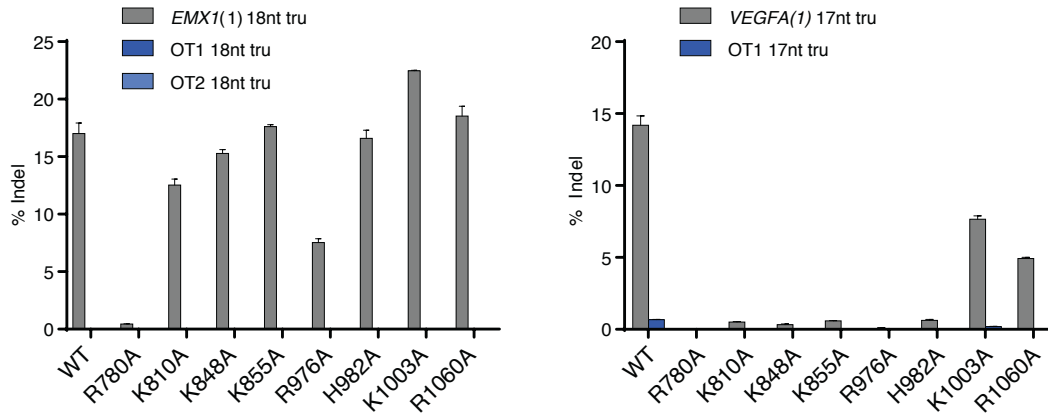

**Fig. S12. Nt-groove mutants are not broadly compatible with truncated guide RNAs.**

Truncated guide RNAs (tru) were combined with single amino acid SpCas9 mutants and targeted to (A) *EMXI(1)* or (B) *VEGFA(1)*. While most mutants targeted to *EMXI(1)* with an 18nt guide retained on-target efficiency, those targeted to *VEGFA(1)* with a 17nt guide were compromised. This indicates that truncated guides are not generally compatible with nt-groove mutants.

**Table S1. Golden Gate primers for mutant generation.**

| SpCas9 primer name | Sequence                                          |
|--------------------|---------------------------------------------------|
| SPCAS9-N           | ATGGTCTCACCGGTGCCACCATGGACTATAAG                  |
| K775A_F            | ATGGTCTCAGGCCGAACAGCCGCGAGAGAATGAAGCGGAT          |
| R778A_F            | ATGGTCTCACGCCGAGAGAATGAAGCGGATCGAAGAGGG           |
| R780A_F            | ATGGTCTCAGGCCGATGAAGCGGATCGAAGAGGGCATCA           |
| K782A_F            | ATGGTCTCAGGCCCGGATCGAAGAGGGCATCAAAGAGCT           |
| K789A_F            | ATGGTCTCACGCCGAGCTGGGCAGCCAGATCCTGAAAGA           |
| K797A_F            | ATGGTCTCAGGCCGAACACCCCGTGGAAAACACCCAGCT           |
| K810A_F            | ATGGTCTCAGGCCGCTGTACCTGTACTACCTGCAGAATGG          |
| R832A_F            | ATGGTCTCAGCCCTGTCCGACTACGATGTGGACCATATC           |
| K848A_F            | ATGGTCTCAGCCGACGACTCCATCGACAACAAGGTGCTGACC        |
| K855A_F            | ATGGTCTCAGCAGTGCTGACCAGAAGCGACAAGAACCGGG          |
| R859A_F            | ATGGTCTCACGCAAGCGACAAGAACCGGGGCAAGAG              |
| K862A_F            | ATGGTCTCACGGAACCGGGGCAAGAGCGACAAC                 |
| K890A_F            | ATGGTCTCACGCCCTGATTACCCAGAGAAAAGTTCGACAA          |
| K961A_F            | ATGGTCTCAGCGCTGGTGTCCGATTTCGGAAGGATTTC            |
| K968A_F            | ATGGTCTCAGCGGATTTCCAGTTTACAAAAGTGC GCGAGATCAACAAC |
| K974A_F            | ATGGTCTCACGCAGTGC GCGAGATCAACA ACTACCACCA         |
| R976A_F            | ATGGTCTCATGGCCGAGATCAACA ACTACCACCACGCC           |
| H982A_F            | ATGGTCTCACGCCACGCCACGACGCCTAC                     |
| K1003A_F           | ATGGTCTCAGCGCTGAAAGCGAGTTCGTGTACGGC               |
| K1014A_F           | ATGGTCTCAGCGGTGTACGACGTGCGGAAGATGATCG             |
| K1047A_F           | ATGGTCTCACGCGACCGAGATTACCCTGGCCAACG               |
| K1059A_F           | ATGGTCTCAGCGCGCCTCTGATCGAGACAAAACGG               |
| R1060A_F           | ATGGTCTCAGGCGCCTCTGATCGAGACAAAACGGCG              |
| K1107A_F           | ATGGTCTCACGCCGAGTCTATCCTGCCCAAGAGGAACAG           |
| K1200A_F           | ATGGTCTCATGCCTACTCCCTGTTCGAGCTGGAAAACGG           |
| H1241A_F           | ATGGTCTCACGCCTATGAGAAGCTGAAGGGCTCCCC              |
| K1289A_F           | ATGGTCTCACGCAGTGTCTCCGCCTACAACAAGCAC              |
| K1296A_F           | ATGGTCTCACGCGCACCGGGATAAGCCCATCAGAG               |
| H1297A_F           | ATGGTCTCAAGGCCCGGGATAAGCCCATCAGAGAGC              |
| K1300A_F           | ATGGTCTCAGCGCCCATCAGAGAGCAGGCCGAG                 |
| H1311A_F           | ATGGTCTCACGCCCTGTTTACCCTGACCAATCTGGGAG            |
| K1325A_F           | ATGGTCTCACGCGTACTTTGACACCACCATCGACCGG             |
| KES_KG_F           | ATGGTCTCAAGGCATCCTGCCCAAGAGGAACAGCGATAA           |
| KES_GG_F           | ATGGTCTCACGGCATCCTGCCCAAGAGGAACAGCGATAA           |
|                    |                                                   |
| SPCAS9-C           | ATGGTCTCAAATTCTTACTTTTCTTTTTCCTGGCC               |
| K775A_R            | ATGGTCTCACGCCTGTCCCTTCTGGGTGGTCTGG                |



|                           |                                                   |
|---------------------------|---------------------------------------------------|
| R778A_R                   | ATGGTCTCAGGCGCTGTTCTTCTGTCCCTTCTGGGTGGT           |
| R780A_R                   | ATGGTCTCACGCCTCGCGGCTGTTCTTCTGTCCCT               |
| K782A_R                   | ATGGTCTCAGGCCATTTCTCTCGCGGCTGTTCTTCTGTCC          |
| K789A_R                   | ATGGTCTCAGGCGATGCCCTCTTCGATCCGCTTCATTCT           |
| K797A_R                   | ATGGTCTCAGGCCAGGATCTGGCTGCCAGCTCTTTGAT            |
| K810A_R                   | ATGGTCTCACGCCTCGTTCTGCAGCTGGGTGTTTTCCA            |
| R832A_R                   | ATGGTCTCAGGGCGTTGATGTCCAGTTCTGGTCCAC              |
| K848A_R                   | ATGGTCTCACGGCCAGAAAGCTCTGAGGCACGATATGGTCCAC       |
| K855A_R                   | ATGGTCTCACTGCGTTGTCGATGGAGTCGTCCTTCAGAAAGCTCTG    |
| R859A_R                   | ATGGTCTCATGCGTTCAGCACCTTGTGTGATGGAGTC             |
| K862A_R                   | ATGGTCTCACGCGTCGCTTCTGGTCAGCACCTTGTGG             |
| K890A_R                   | ATGGTCTCAGGCGGCGTTCAGCAGCTGCCGCCAGTAGTT           |
| K961A_R                   | ATGGTCTCAGCGCGGACTTCAGGGTGATCACTTTCCTTC           |
| K968A_R                   | ATGGTCTCACCGCCGAAATCGGACACCAGCTTG                 |
| K974A_R                   | ATGGTCTCATGCGTAAAAGCTGAAATCCTTCCGAAATCGGACAC      |
| R976A_R                   | ATGGTCTCAGCCACTTTGTAAAAGCTGAAATCCTTCCGAAATCGG     |
| H982A_R                   | ATGGTCTCAGGCGTAGTTGTTGATCTCGCGCACTTTGTAAAAGCTG    |
| K1003A_R                  | ATGGTCTCAGCGCAGGGTACTTTTTGATCAGGGCGGTTTC          |
| K1014A_R                  | ATGGTCTCACCGCGTAGTCGCCGTACACGAACTCG               |
| K1047A_R                  | ATGGTCTCACGCGAAAAAGTTCATGATGTTGCTGTAGAAGAAGTACTGG |
| K1059A_R                  | ATGGTCTCAGCGCCCGATCTCGCCGTTGGC                    |
| R1060A_R                  | ATGGTCTCACGCCTTCCGGATCTCGCCGTTGGC                 |
| K1107A_R                  | ATGGTCTCAGGCGCTGAAGCCGCCTGTCTGCACCTCGGT           |
| K1200A_R                  | ATGGTCTCAGGCAGGCAGCTTGATGATCAGGTCCTTTTT           |
| H1241A_R                  | ATGGTCTCAGGCGCTGGCCAGGTACAGGAAGTTAC               |
| K1289A_R                  | ATGGTCTCATGCGTCCAGATTAGCGTCGCCAGGATC              |
| K1296A_R                  | ATGGTCTCACGCGTTGTAGGCGGACAGCACTTTGTCC             |
| H1297A_R                  | ATGGTCTCAGCCTTGTGTAGGCGGACAGCACTTTGTCC            |
| K1300A_R                  | ATGGTCTCAGCGCATCCCGGTGCTTGTGTAGGCG                |
| H1311A_R                  | ATGGTCTCAGGCGATGATATTCTCGGCCTGCTCTCTGATG          |
| K1325A_R                  | ATGGTCTCACGCGAAGGCGCAGGGGCTCC                     |
| KES_KG_R                  | ATGGTCTCAGCCTTTGCTGAAGCCGCTGTCTGCACCTC            |
| KES_GG_R                  | ATGGTCTCAGCCGCCGCTGAAGCCGCTGTCTGCACCTC            |
|                           |                                                   |
| <b>SaCas9 primer name</b> | <b>Sequence</b>                                   |
| SACAS9-N                  | ATGAAGACTACCGGTGCCACCATGGCCC                      |
| R497A_F                   | ATGAAGACTAGCCAACCGGCAGACCAACGAGCG                 |
| K518A_F                   | ATGAAGACTAGCGTACCTGATCGAGAAGATCAAGCTGCA           |
| K523A_F                   | ATGAAGACTAGCGATCAAGCTGCACGACATGCAGGA              |
| K525A_F                   | ATGAAGACTAGCGCTGCACGACATGCAGGAAGGC                |
| H557A_F                   | ATGAAGACTAGCCATCATCCCCAGAAGCGTGCCTTC              |

|               |                                             |
|---------------|---------------------------------------------|
| R561A_F       | ATGAAGACTAGCAAGCGTGTCTTCGACAACAGCTTC        |
| K572A_F       | ATGAAGACTAGCGGTGCTCGTGAAGCAGGAAGAAAACA      |
| R634A_F       | ATGAAGACTAGCGTTCTCCGTGCAGAAAGACTTCATCAAC    |
| R686A_F       | ATGAAGACTAGCGAAGTGGAAAGTTTAAGAAAGAGCGGAACAA |
| K692A_F       | ATGAAGACTAGCAGAGCGGAACAAGGGGTACAAGCAC       |
| R694A_F       | ATGAAGACTAGCGAACAAGGGGTACAAGCACCACGC        |
| H700A_F       | ATGAAGACTAGCCCACGCCGAGGACGCCCTGA            |
| K751A_F       | ATGAAGACTAGCAGAGATCTTCATCACCCCCACCAG        |
| R499A;Q500K_F | ATGAAGACTAGCAAAGACCAACGAGCGGATCGAGG         |
| R654A;G655R_F | ATGAAGACTAGCCCGCCTGATGAACCTGCTGCGG          |
| SACAS9-C      | ATGAAGACTAAATTCTTAAGCGTAATCTGGAACATCGTATGG  |
| R497A_R       | ATGAAGACTATGGCCTTCTGCATCTCGTTGATCATTTTCTG   |
| K518A_R       | ATGAAGACTAACGCGGCGTTCTCTTTGCCGGTGG          |
| K523A_R       | ATGAAGACTATCGCCTCGATCAGGTAAGTGGCGTTCTCTT    |
| K525A_R       | ATGAAGACTAGCGCGATCTTCTCGATCAGGTAAGTGGCGT    |
| H557A_R       | ATGAAGACTATGGCGTCCACCTCATAGTTGAAGGGGTTGT    |
| R561A_R       | ATGAAGACTATTGCGGGGATGATGTGGTCCACCTCATA      |
| K572A_R       | ATGAAGACTACCGCGTTGTTGAAGCTGTTGTCGAAGGACA    |
| R634A_R       | ATGAAGACTAACGCGTTGATGTCCCCTTCTTCCAGCA       |
| R686A_R       | ATGAAGACTATCGCCCCGAGAAAGCTGGTGAAGCC         |
| K692A_R       | ATGAAGACTACTGCCTTAAACTTCCACTTCCGCCGCA       |
| R694A_R       | ATGAAGACTATCGCCTCTTCTTAAACTTCCACTTCCGCC     |
| H700A_R       | ATGAAGACTAGGGCCTTGTACCCCTTGTCCGCTCTTTC      |
| K751A_R       | ATGAAGACTACTGCGTACTCTGCTCGGTTTCGATCTCG      |
| R499A;Q500K_R | ATGAAGACTATTGCGTTCCGCTTCTGCATCTCGTTGA       |
| R654A;G655R_R | ATGAAGACTAGGGCGGTGGCGTATCTGGTATCCACCA       |



**Table S3. BLESS DSB, similarity scores and genomic addresses**

| Target                          | chr | pos       | sequence of homology     | DSB  | Similarity Score | Indel % (rep 1) | Indel % (rep 2) |
|---------------------------------|-----|-----------|--------------------------|------|------------------|-----------------|-----------------|
| WT SpCas9 <i>VEGFA</i> (1)      | 6   | 43737469  | GGTGAGTGAGTGTGTGCGTG tGG | 4.98 | 69               | 50.92           | 52.07           |
|                                 | 22  | 37662823  | GCTGAGTGAGTGTATGCGTG tGG | 1.69 | 61               | 35.97           | 35.46           |
|                                 | 5   | 115434674 | TGTGGGTGAGTGTGTGCGTG aGG | 1.64 | 61               | 44.20           | 40.93           |
|                                 | 5   | 89440968  | AGAGAGTGAGTGTGTGCATG aGG | 1.51 | 58               | 29.44           | 34.31           |
|                                 | 14  | 65569158  | AGTGAGTGAGTGTGTGTG gGG   | 0.96 | 62               | no data         | no data         |
|                                 | 14  | 106029030 | GGTGAGTGAGTGTGTGTG aGG   | 0.55 | 65               | 30.59           | 28.61           |
|                                 | 11  | 68851137  | GGTGAGTGAGTGCGTGCGG tGG  | 0.35 | 61               | 24.68           | 25.33           |
|                                 | 20  | 20178283  | AGTGTGTGAGTGTGTGCGTG tGG | 0.33 | 62               | 20.58           | 18.90           |
|                                 | 14  | 62078772  | TGTGAGTAAGTGTGTGTG tGG   | 0.28 | 58               | 15.04           | 12.06           |
|                                 | 2   | 177463424 | GGTGAGTGTGTGTGCATG tGG   | 0.26 | 61               | no data         | no data         |
|                                 | 10  | 98760587  | GTTGAGTGAATGTGTGCGTG aGG | 0.22 | 61               | no data         | no data         |
|                                 | 19  | 6109031   | GTGAGTGAGTGTGTGTG gAG    | 0.20 | 56               | no data         | no data         |
|                                 | 14  | 74353495  | AGCGAGTGGGTGTGTGCGTG gGG | 0.17 | 57               | 4.85            | 4.45            |
|                                 |     |           |                          |      |                  |                 |                 |
| SpCas9 (K855A) <i>VEGFA</i> (1) | 6   | 43737469  | GGTGAGTGAGTGTGTGCGTG tGG | 5.10 | 69               | 59.73           | 59.31           |
|                                 | 22  | 37662823  | GcTGAGTGAGTGTaTGCGTG tGG | 0.68 | 61               | 14.73           | 10.99           |
|                                 | 5   | 115434674 | TGTGGGTGAGTGTGTGCGTG aGG | 0.51 | 61               | 6.33            | 4.07            |
|                                 | 5   | 89440968  | AGAGAGTGAGTGTGTGCATG aGG | 0    | 58               | 3.05            | 3.10            |
|                                 | 14  | 65569158  | AGTGAGTGAGTGTGTGTG gGG   | 0.81 | 62               | no data         | no data         |
|                                 | 14  | 106029030 | GGTGAGTGAGTGTGTGtTG aGG  | 0.99 | 65               | 25.52           | 22.61           |
|                                 | 11  | 68851137  | GGTGAGTGAGTGCGTGCGG tGG  | 0.00 | 61               | 2.47            | 1.98            |
|                                 | 20  | 20178283  | AGTGTGTGAGTGTGTGCGTG tGG | 0.00 | 62               | 0.20            | 0.31            |

|                          |    |           |                          |      |    |         |         |
|--------------------------|----|-----------|--------------------------|------|----|---------|---------|
|                          | 14 | 62078772  | TGTGAGTAAGTGTGTGTGTG tGG | 0.00 | 58 | 0.09    | 0.05    |
|                          | 2  | 177463424 | GGTGAGTGTGTGTGCATG tGG   | 0    | 61 | no data | no data |
|                          | 10 | 98760587  | GTTGAGTGAATGTGTGCGTG aGG | 0    | 61 | no data | no data |
|                          | 19 | 6109031   | GTGAGTGAATGTGTGTGTG gAG  | 0    | 56 | no data | no data |
|                          | 14 | 74353495  | AGCGAGTGGGTGTGTGCGTG gGG | 0.00 | 57 | 0.13    | 0.03    |
|                          |    |           |                          |      |    |         |         |
| eSpCas9(1.1)<br>VEGFA(1) | 6  | 43737469  | GGTGAGTGAATGTGTGCGTG tGG | 5.88 | 69 | 58.18   | 59.37   |
|                          | 22 | 37662823  | GCTGAGTGAATGTGTGCGTG tGG | 0.00 | 61 | 0.00    | 0.13    |
|                          | 5  | 115434674 | TGTGGGTGAGTGTGTGCGTG aGG | 0.00 | 61 | 0.05    | 0.01    |
|                          | 5  | 89440968  | AGAGAGTGAATGTGTGCATG aGG | 0    | 58 | 0.06    | 0.05    |
|                          | 14 | 65569158  | AGTGAGTGAATGTGTGTGTG gGG | 0.91 | 62 | no data | no data |
|                          | 14 | 106029030 | GGTGAGTGAATGTGTGTGTG aGG | 1.69 | 65 | 27.00   | 25.11   |
|                          | 11 | 68851137  | GGTGAGTGAATGTGTGCGGG tGG | 0.00 | 61 | 0.28    | 0.41    |
|                          | 20 | 20178283  | AGTGTGTGAGTGTGTGCGTG tGG | 0.00 | 62 | 0.10    | 0.09    |
|                          | 14 | 62078772  | TGTGAGTAAGTGTGTGTGTG tGG | 0.00 | 58 | 0.00    | 0.00    |
|                          | 2  | 177463424 | GGTGAGTGTGTGTGTGCATG tGG | 0    | 61 | no data | no data |
|                          | 10 | 98760587  | GTTGAGTGAATGTGTGCGTG aGG | 0    | 61 | no data | no data |
|                          | 19 | 6109031   | GTGAGTGAATGTGTGTGTG gAG  | 0    | 56 | no data | no data |
|                          | 14 | 74353495  | AGCGAGTGGGTGTGTGCGTG gGG | 0.00 | 57 | 0.00    | 0.04    |
|                          |    |           |                          |      |    |         |         |
| WT SpCas9 EMX1(1)        | 2  | 73160997  | GAGTCCGAGCAGAAGAAGAA gGG | 6.13 | 69 | 63.56   | 60.46   |
|                          | 5  | 45359066  | GAGTTAGAGCAGAAGAAGAA aGG | 1.43 | 61 | 52.12   | 56.83   |
|                          | 15 | 44109762  | GAGTCTAAGCAGAAGAAGAA gAG | 0.84 | 61 | 30.19   | 26.75   |
|                          | 5  | 9227161   | AAGTCTGAGCACAAGAAGAA tGG | 0.20 | 57 | 4.24    | 4.66    |

|                           |    |           |                            |       |    |       |       |
|---------------------------|----|-----------|----------------------------|-------|----|-------|-------|
|                           | 8  | 128801257 | GAGTCCTAGCAGGAGAAGAA gAG   | 0.29  | 61 | 4.50  | 5.21  |
|                           |    |           |                            |       |    |       |       |
| SpCas9 (K855A)<br>EMX1(1) | 2  | 73160997  | GAGTCCGAGCAGAAGAAGAA gGG   | 12.85 | 69 | 59.30 | 56.47 |
|                           | 5  | 45359066  | GAGTTAGAGCAGAAGAAGAA aGG   | 0.00  | 61 | 0.99  | 1.31  |
|                           | 15 | 44109762  | GAGTCTAAGCAGAAGAAGAA gAG   | 0.00  | 61 | 0.68  | 1.23  |
|                           | 5  | 9227161   | AAGTCTGAGCACAGAAGAAGAA tGG | 0.00  | 57 | 0.00  | 0.11  |
|                           | 8  | 128801257 | GAGTCCTAGCAGGAGAAGAA gAG   | 0.00  | 61 | 0.20  | 0.35  |
|                           |    |           |                            |       |    |       |       |
| eSpCas9(1.1)<br>EMX1(1)   | 2  | 73160997  | GAGTCCGAGCAGAAGAAGAA gGG   | 13.77 | 69 | 52.47 | 49.36 |
|                           | 5  | 45359066  | GAGTTAGAGCAGAAGAAGAA aGG   | 0.00  | 61 | 0.02  | 0.03  |
|                           | 15 | 44109762  | GAGTCTAAGCAGAAGAAGAA gAG   | 0.00  | 61 | 0.14  | 0.00  |
|                           | 5  | 9227161   | AAGTCTGAGCACAGAAGAAGAA tGG | 0.00  | 57 | 0.00  | 0.24  |
|                           | 8  | 128801257 | GAGTCCTAGCAGGAGAAGAA gAG   | 0.00  | 61 | 0.00  | 0.00  |

## SUPPLEMENTARY SEQUENCES

### Wild-type SpCas9

ATGGCCCCAAAGAAGAAGCGGAAGGTTCGGTATCCACGGAGTCCCAGCAGCCGACA  
AGAAGTACAGCATCGGCCTGGACATCGGCACCAACTCTGTGGGCTGGGCCGTGATC  
ACCGACGAGTACAAGGTGCCAGCAAGAAATTCAAGGTGCTGGGCAACACCGACCG  
GCACAGCATCAAGAAGAACCTGATCGGAGCCCTGCTGTTCGACAGCGGCGAAACAG  
CCGAGGCCACCCGGCTGAAGAGAACCGCCAGAAGAAGATACACCAGACGGAAGAA  
CCGGATCTGCTATCTGCAAGAGATCTTCAGCAACGAGATGGCCAAGGTGGACGACA  
GCTTCTTCCACAGACTGGAAGAGTCCTTCTGGTGGAAAGAGGATAAGAAGCACGAG  
CGGCACCCCATCTTCGGCAACATCGTGGACGAGGTGGCCTACCACGAGAAGTACCC  
CACCATCTACCACCTGAGAAAGAACTGGTGGACAGCACCGACAAGGCCGACCTGC  
GGCTGATCTATCTGGCCCTGGCCACATGATCAAGTTCCGGGGCCACTTCCTGATCG  
AGGGCGACCTGAACCCCGACAACAGCGACGTGGACAAGCTGTTTCATCCAGCTGGTG  
CAGACCTACAACCAGCTGTTTCGAGGAAAACCCCATCAACGCCAGCGGCGTGGACGC  
CAAGGCCATCCTGTCTGCCAGACTGAGCAAGAGCAGACGGCTGGAAAATCTGATCG  
CCCAGCTGCCC GGCGAGAAGAAGAATGGCCTGTTTCGAAACCTGATTGCCCTGAGC  
CTGGGCCTGACCCCAACTTCAAGAGCAACTTCGACCTGGCCGAGGATGCCAACT  
GCAGCTGAGCAAGGACACCTACGACGACGACCTGGACAACCTGCTGGCCCAGATCG  
GCGACCAGTACGCCGACCTGTTTCTGGCCGCAAGAACCTGTCCGACGCCATCCTGC  
TGAGCGACATCCTGAGAGTGAACACCGAGATCACCAAGGCCCCCTGAGCGCCTCT  
ATGATCAAGAGATACGACGAGCACACCAGGACCTGACCCTGCTGAAAGCTCTCGT  
GCGGCAGCAGCTGCCTGAGAAGTACAAAGAGATTTTCTTCGACCAGAGCAAGAACG  
GCTACGCCGGCTACATTGACGGCGGAGCCAGCCAGGAAGAGTTCTACAAGTTCATC  
AAGCCCATCCTGGAAAAGATGGACGGCACCGAGGAACTGCTCGTGAAGCTGAACAG  
AGAGGACCTGCTGCGGAAGCAGCGGACCTTCGACAACGGCAGCATCCCCACCAGA  
TCCACCTGGGAGAGCTGCACGCCATTCTGCGGCGGCAGGAAGATTTTTACCCATTCC  
TGAAGGACAACCGGGAAAAGATCGAGAAGATCCTGACCTCCGCATCCCCTACTAC  
GTGGGCCCTCTGGCCAGGGGAAACAGCAGATTCGCCTGGATGACCAGAAAGAGCGA  
GGAAACCATCACCCCTGGA ACTTCGAGGAAGTGGTGGACAAGGGCGCTTCCGCC  
AGAGCTTCATCGAGCGGATGACCAACTTCGATAAGAACCTGCCCAACGAGAAGGTG  
CTGCCCAAGCACAGCCTGCTGTACGAGTACTTCACCGTGTATAACGAGCTGACCAA  
GTGAAATACGTGACCGAGGGAATGAGAAAGCCCGCCTTCTGAGCGGCGAGCAGAA  
AAAGGCCATCGTGGACCTGCTGTTCAAGACCAACCGGAAAGTGACCGTGAAGCAGC  
TGAAAGAGGACTACTTCAAGAAAATCGAGTGCTTCGACTCCGTGGAAATCTCCGGC  
GTGGAAGATCGTTCAACGCCTCCCTGGGCACATAACCACGATCTGCTGAAAATTATC  
AAGGACAAGGACTTCTGGACAATGAGGAAAACGAGGACATTCTGGAAGATATCGT  
GCTGACCCTGACACTGTTTGAGGACAGAGAGATGATCGAGGAACGGCTGAAAACCT  
ATGCCACCTGTTTCGACGACAAAGTGATGAAGCAGCTGAAGCGGCGGAGATACACC  
GGCTGGGGCAGGCTGAGCCGGAAGCTGATCAACGGCATCCGGGACAAGCAGTCCGG  
CAAGACAATCCTGGATTTCTGAAGTCCGACGGCTTCGCCAACAGAACTTCATGCA  
GCTGATCCACGACGACAGCCTGACCTTTAAAGAGGACATCCAGAAAGCCCAGGTGT  
CCGGCCAGGGCGATAGCCTGCACGAGCACATTGCCAATCTGGCCGGCAGCCCCGCC  
ATTAAGAAGGGCATCCTGCAGACAGTGAAGGTGGTGGACGAGCTCGTGAAAGTGAT  
GGGCCGGCACAAGCCCGAGAACATCGTGATCGAAATGGCCAGAGAGAACCAGACC  
ACCCAGAAGGGACAGAAGAACAGCCGCGAGAGAATGAAGCGGATCGAAGAGGGCA

TCAAAGAGCTGGGCAGCCAGATCCTGAAAGAACACCCCGTGGAAAACACCCAGCTG  
CAGAACGAGAAGCTGTACCTGTACTACCTGCAGAATGGGCGGGATATGTACGTGGA  
CCAGGAACTGGACATCAACCGGCTGTCCGACTACGATGTGGACCATATCGTGCCTCA  
GAGCTTTCTGAAGGACGACTCCATCGACAACAAGGTGCTGACCAGAAGCGACAAGA  
ACCGGGGCAAGAGCGACAACGTGCCCTCCGAAGAGGTCGTGAAGAAGATGAAGAA  
CTACTGGCGGCAGCTGCTGAACGCCAAGCTGATTACCCAGAGAAAGTTCGACAATC  
TGACCAAGGCCGAGAGAGGGCGGCCTGAGCGAACTGGATAAGGCCGGCTTCATCAAG  
AGACAGCTGGTGGAAACCCGGCAGATCACAAAGCACGTGGCACAGATCCTGGACTC  
CCGGATGAACACTAAGTACGACGAGAATGACAAGCTGATCCGGGAAGTGAAAGTGA  
TCACCCTGAAGTCCAAGCTGGTGTCCGATTTCCGGAAGGATTTCCAGTTTTACAAAG  
TGCGCGAGATCAACAACCTACCACCACGCCACGACGCCTACCTGAACGCCGTCGTG  
GGAACCGCCCTGATCAAAAAGTACCCTAAGCTGGAAAGCGAGTTCGTGTACGGCGA  
CTACAAGGTGTACGACGTGCGGAAGATGATCGCCAAGAGCGAGCAGGAAATCGGCA  
AGGCTACCGCCAAGTACTTCTTCTACAGCAACATCATGAACTTTTTCAAGACCGAGA  
TTACCCTGGCCAACGGCGAGATCCGGAAGCGGCCTCTGATCGAGACAAACGGCGAA  
ACCGGGGAGATCGTGTGGGATAAGGGCCGGGATTTTGCCACCGTGCGGAAAGTGCT  
GAGCATGCCCAAGTGAATATCGTGAAAAGACCGAGGTGCAGACAGGCGGCTTCA  
GCAAAGAGTCTATCCTGCCAAGAGGAACAGCGATAAGCTGATCGCCAGAAAGAAG  
GACTGGGACCCTAAGAAGTACGGCGGCTTCGACAGCCCCACCGTGGCCTATTCTGTG  
CTGGTGGTGGCCAAAGTGGAAGGGCAAGTCCAAGAACTGAAGAGTGTGAAAG  
AGCTGCTGGGGATCACCATCATGGAAAGAAGCAGCTTCGAGAAGAATCCCATCGAC  
TTTCTGGAAGCCAAGGGCTACAAAGAAGTGAAAAGGACCTGATCATCAAGCTGCC  
TAAGTACTCCCTGTTTCGAGCTGGAAAACGGCCGGAAGAGAATGCTGGCCTCTGCCG  
GCCAACTGCAGAAGGGAAACGAACTGGCCCTGCCCTCCAAATATGTGAACTTCTG  
TACCTGGCCAGCCACTATGAGAAGCTGAAGGGCTCCCCGAGGATAATGAGCAGAA  
ACAGCTGTTTGTGGAACAGCACAAAGCACTACCTGGACGAGATCATCGAGCAGATCA  
GCGAGTTCTCCAAGAGAGTGATCCTGGCCGACGCTAATCTGGACAAAGTGCTGTCCG  
CCTACAACAAGCACCGGGATAAGCCCATCAGAGAGCAGGCCGAGAATATCATCCAC  
CTGTTTACCCTGACCAATCTGGGAGCCCCTGCCGCCTTCAAGTACTTTGACACCACC  
ATCGACCGGAAGAGGTACACCAGCACCAAGAGGTGCTGGACGCCACCCTGATCCA  
CCAGAGCATACCGGCCTGTACGAGACACGGATCGACCTGTCTCAGCTGGGAGGCG  
ACAAAAGGCCGCGGCCACGAAAAGGCCGGCCAGGCAAAAAGAAAAGTAA

>K855A

ATGGACTATAAGGACCACGACGGAGACTACAAGGATCATGATATTGATTACAAAGA  
CGATGACGATAAGATGGCCCCAAGAAGAAGCGGAAGGTTCGGTATCCACGGAGTCC  
CAGCAGCCGACAAGAAGTACAGCATCGGCCTGGACATCGGCACCAACTCTGTGGGC  
TGGGCCGTGATCACCGACGAGTACAAGGTGCCAGCAAGAAATTCAAGGTGCTGGG  
CAACACCGACCGGCACAGCATCAAGAAGAACCTGATCGGAGCCCTGCTGTTTCGACA  
GCGGCGAAACAGCCGAGGCCACCCGGCTGAAGAGAACCGCCAGAAGAAGATACAC  
CAGACGGAAGAACCGGATCTGCTATCTGCAAGAGATCTTCAGCAACGAGATGGCCA  
AGGTGGACGACAGCTTCTTCCACAGACTGGAAGAGTCCTTCTTGGTGGAAAGAGGAT  
AAGAAGCACGAGCGGCACCCCATCTTCGGCAACATCGTGGACGAGGTGGCCTACCA  
CGAGAAGTACCCACCATCTACCACCTGAGAAAGAACTGGTGGACAGCACCGACA  
AGGCCGACCTGCGGCTGATCTATCTGGCCCTGGCCCACATGATCAAGTTCGGGGGCC  
ACTTCTGATCGAGGGCGACCTGAACCCCGACAACAGCGACGTGGACAAGCTGTTT



ATCCAGCTGGTGCAGACCTACAACCAGCTGTTCGAGGAAAACCCCATCAACGCCAG  
CGGCGTGGACGCCAAGGCCATCCTGTCTGCCAGACTGAGCAAGAGCAGACGGCTGG  
AAAATCTGATCGCCAGCTGCCCGGCGAGAAGAAGAATGGCCTGTTCGGAAACCTG  
ATTGCCCTGAGCCTGGGCCTGACCCCAACTTCAAGAGCAACTTCGACCTGGCCGAG  
GATGCCAAACTGCAGCTGAGCAAGGACACCTACGACGACGACCTGGACAACCTGCT  
GGCCAGATCGGCGACCAGTACGCCGACCTGTTTCTGGCCGCCAAGAACCTGTCCG  
ACGCCATCCTGCTGAGCGACATCCTGAGAGTGAACACCGAGATCACCAAGGCCCCC  
CTGAGCGCCTCTATGATCAAGAGATACGACGAGCACCACCAGGACCTGACCCTGCT  
GAAAGCTCTCGTGCGGCAGCAGCTGCCTGAGAAGTACAAAGAGATTTTCTTCGACC  
AGAGCAAGAACGGCTACGCCGGCTACATTGACGGCGGAGCCAGCCAGGAAGAGTTC  
TACAAGTTCATCAAGCCCATCCTGGAAAAGATGGACGGCACCCGAGGAACCTGCTCGT  
GAAGCTGAACAGAGAGGACCTGCTGCGGAAGCAGCGGACCTTCGACAACGGCAGC  
ATCCCCCACCAGATCCACCTGGGAGAGCTGCACGCCATTCTGCGGCGGCAGGAAGA  
TTTTTACCCATTCTGAAGGACAACCGGGAAAAGATCGAGAAGATCCTGACCTTCCG  
CATCCCCTACTACGTGGGCCCTCTGGCCAGGGGAAACAGCAGATTCGCCTGGATGA  
CCAGAAAGAGCGAGGAACCATCACCCCTGGAACCTTCGAGGAAGTGGTGGACAA  
GGGCGCTTCCGCCCAGAGCTTCATCGAGCGGATGACCAACTTCGATAAGAACCTGC  
CCAACGAGAAGGTGCTGCCAAGCACAGCCTGCTGTACGAGTACTTCACCGTGTAT  
AACGAGCTGACCAAAGTCAAATACGTGACCGAGGGAATGAGAAAGCCCGCCTTCT  
GAGCGGCGAGCAGAAAAGGCCATCGTGGACCTGCTGTTCAAGACCAACCGGAAA  
GTGACCGTGAAGCAGCTGAAAGAGGACTACTTCAAGAAAATCGAGTGCTTCGACTC  
CGTGGAATCTCCGGCGTGGAAGATCGGTTCAACGCCTCCCTGGGCACATAACCAG  
ATCTGCTGAAAATTATCAAGGACAAGGACTTCTGGACAATGAGGAAAACGAGGAC  
ATTCTGGAAGATATCGTGCTGACCCTGACACTGTTTGAGGACAGAGAGATGATCGA  
GGAACGGCTGAAAACCTATGCCACCTGTTTCGACGACAAAGTGATGAAGCAGCTGA  
AGCGGCGGAGATACACCGGCTGGGGCAGGCTGAGCCGGAAGCTGATCAACGGCATC  
CGGGACAAGCAGTCCGGCAAGACAATCCTGGATTTCTGAAGTCCGACGGCTTCGC  
CAACAGAACTTCATGCAGCTGATCCACGACGACAGCCTGACCTTTAAAGAGGACA  
TCCAGAAAGCCCAGGTGTCCGGCCAGGGCGATAGCCTGCACGAGCACATTGCCAAT  
CTGGCCGGCAGCCCCGCCATTAAGAAGGGCATCCTGCAGACAGTGAAGGTGGTGG  
CGAGCTCGTGAAAGTGATGGGCCGGCACAAGCCCGAGAACATCGTGATCGAAATGG  
CCAGAGAGAACCAGACCACCCAGAAGGGACAGAAGAACAGCCGCGAGAGAATGAA  
GCGGATCGAAGAGGGCATCAAAGAGCTGGGCAGCCAGATCCTGAAAGAACACCCC  
GTGGAAAACACCCAGCTGCAGAACGAGAAGCTGTACCTGTACTACCTGCAGAATGG  
GCGGGATATGTACGTGGACCAGGAACCTGGACATCAACCGGCTGTCCGACTACGATG  
TGACCATATCGTGCCTCAGAGCTTTCTGAAGGACGACTCCATCGACAACGGGTGC  
TGACCAGAAGCGACAAGAACCGGGGCAAGAGCGACAACGTGCCCTCCGAAGAGGT  
CGTGAAGAAGATGAAGAACTACTGGCGGCAGCTGCTGAACGCCAAGCTGATTACCC  
AGAGAAAGTTCGACAATCTGACCAAGGCCGAGAGAGGCGGCCTGAGCGAACTGGAT  
AAGGCCGGCTTCATCAAGAGACAGCTGGTGGAAACCCGGCAGATCACAAAGCACGT  
GGCACAGATCCTGGACTCCCGGATGAACACTAAGTACGACGAGAATGACAAGCTGA  
TCCGGGAAGTGAAAGTGATCACCTGAAGTCCAAGCTGGTGTCCGATTTCCGGAAG  
GATTTCCAGTTTTACAAAGTGCGCGAGATCAACAACCTACCACCACGCCACGACGCC  
TACCTGAACGCCGTCGTGGGAACCGCCCTGATCAAAAAGTACCCTAAGCTGGAAAG  
CGAGTTCGTGTACGGCGACTACAAGGTGTACGACGTGCGGAAGATGATCGCCAAGA  
GCGAGCAGGAAATCGGCAAGGCTACCGCCAAGTACTTCTTCTACAGCAACATCATG

AACTTTTTCAAGACCGAGATTACCCTGGCCAACGGCGAGATCCGGAAGCGGCCTCT  
GATCGAGACAAACGGCGAAACCGGGGAGATCGTGTGGGATAAGGGCCGGGATTTTG  
CCACCGTGCGGAAAGTGCTGAGCATGCCCAAGTGAATATCGTGAAAAAGACCGAG  
GTGCAGACAGGCGGCTTCAGCAAAGAGTCTATCCTGCCCAAGAGGAACAGCGATAA  
GCTGATCGCCAGAAAGAAGGACTGGGACCCTAAGAAGTACGGCGGCTTCGACAGCC  
CCACCGTGGCCTATTCTGTGCTGGTGGTGGCCAAGTGGAAAAGGGCAAGTCCAAG  
AAACTGAAGAGTGTGAAAGAGCTGCTGGGGATCACCATCATGGAAAGAAGCAGCTT  
CGAGAAGAATCCCATCGACTTTCTGGAAGCCAAGGGCTACAAAGAAGTGAAAAAGG  
ACCTGATCATCAAGCTGCCTAAGTACTCCCTGTTTCGAGCTGGAAAACGGCCGGAAG  
AGAATGCTGGCCTCTGCCGGCGAACTGCAGAAGGGAAACGAACTGGCCCTGCCCTC  
CAAATATGTGAACTTCCTGTACCTGGCCAGCCACTATGAGAAGCTGAAGGGCTCCCC  
CGAGGATAATGAGCAGAAACAGCTGTTTGTGGAACAGCACAAGCACTACCTGGACG  
AGATCATCGAGCAGATCAGCGAGTTCTCCAAGAGAGTGATCCTGGCCGACGCTAAT  
CTGGACAAAGTGCTGTCCGCCTACAACAAGCACCGGGATAAGCCCATCAGAGAGCA  
GGCCGAGAATATCATCCACCTGTTTACCCTGACCAATCTGGGAGCCCCTGCCGCCTT  
CAAGTACTTTGACACCACCATCGACCGGAAGAGGTACACCAGCACCAAAGAGGTGC  
TGGACGCCACCCTGATCCACCAGAGCATCACCGGCCTGTACGAGACACGGATCGAC  
CTGTCTCAGCTGGGAGGCGACAAAAGGCCGGCGGCCACGAAAAGGCCGGCCAGG  
CAAAAAGAAAAAGTAA

eSpCas9(1.0)

ATGGACTATAAGGACCACGACGGAGACTACAAGGATCATGATATTGATTACAAAGA  
CGATGACGATAAGATGGCCCCAAAGAAGAAGCGGAAGGTTCGGTATCCACGGAGTCC  
CAGCAGCCGACAAGAAGTACAGCATCGGCCTGGACATCGGCACCAACTCTGTGGGC  
TGGGCCGTGATCACCGACGAGTACAAGGTGCCAGCAAGAAATTCAAGGTGCTGGG  
CAACACCGACCGGCACAGCATCAAGAAGAACCTGATCGGAGCCCTGCTGTTTCGACA  
GCGGCGAAACAGCCGAGGCCACCCGGCTGAAGAGAACCGCCAGAAGAAGATACAC  
CAGACGGAAGAACCGGATCTGCTATCTGCAAGAGATCTTCAGCAACGAGATGGCCA  
AGGTGGACGACAGCTTCTTCCACAGACTGGAAGAGTCCTTCCCTGGTGGAAAGAGGAT  
AAGAAGCACGAGCGGCACCCCATCTTCGGCAACATCGTGGACGAGGTGGCCTACCA  
CGAGAAGTACCCACCATCTACCACCTGAGAAAGAACTGGTGGACAGCACCGACA  
AGGCCGACCTGCCGGCTGATCTATCTGGCCCTGGCCCACATGATCAAGTTCCGGGGCC  
ACTTCCCTGATCGAGGGCGACCTGAACCCCGACAACAGCGACGTGGACAAGCTGTTT  
ATCCAGCTGGTGCAGACCTACAACCAGCTGTTTCGAGGAAAACCCCATCAACGCCAG  
CGGCGTGGACGCCAAGGCCATCCTGTCTGCCAGACTGAGCAAGAGCAGACGGCTGG  
AAAATCTGATCGCCAGCTGCCCGGCGAGAAGAAGAATGGCCTGTTTCGGAAACCTG  
ATTGCCCTGAGCCTGGGCCTGACCCCAACTTCAAGAGCAACTTCGACCTGGCCGAG  
GATGCCAAACTGCAGCTGAGCAAGGACACCTACGACGACGACCTGGACAACCTGCT  
GGCCCAGATCGGCGACCAGTACGCCGACCTGTTTCTGGCCGCCAAGAACCTGTCCG  
ACGCCATCCTGCTGAGCGACATCCTGAGAGTGAACACCGAGATACCAAGGCCCCC  
CTGAGCGCCTCTATGATCAAGAGATACGACGAGCACCACCAGGACCTGACCCTGCT  
GAAAGCTCTCGTGCGGCAGCAGCTGCCTGAGAAGTACAAAGAGATTTTCTTCGACC  
AGAGCAAGAACGGCTACGCCGGCTACATTGACGGCGGAGCCAGCCAGGAAGAGTTC  
TACAAGTTCATCAAGCCCATCCTGGAAAAGATGGACGGCACCGAGGAAGTCTCGT  
GAAGCTGAACAGAGAGGACCTGCTGCGGAAGCAGCGGACCTTCGACAACGGCAGC  
ATCCCCACCAGATCCACCTGGGAGAGCTGCACGCCATTCTGCGGCGGCAGGAAGA

TTTTTACCCATTCCTGAAGGACAACCGGGAAAAGATCGAGAAGATCCTGACCTTCCG  
CATCCCCTACTACGTGGGCCCTCTGGCCAGGGGAAACAGCAGATTCGCCTGGATGA  
CCAGAAAGAGCGAGGAAACCATCACCCCCTGGAAC TTCGAGGAAGTGGTGGACAA  
GGGCGCTTCCGCCAGAGCTTCATCGAGCGGATGACCAACTTCGATAAGAACCTGC  
CCAACGAGAAGGTGCTGCCAAGCACAGCCTGCTGTACGAGTACTTCACCGTGTAT  
AACGAGCTGACCAAAGTGAAATACGTGACCGAGGGAATGAGAAAGCCCGCCTTCT  
GAGCGGCGAGCAGAAAAAGGCCATCGTGGACCTGCTGTTCAAGACCAACCGGAAA  
GTGACCGTGAAGCAGCTGAAAGAGGACTACTTCAAGAAAATCGAGTGCTTCGACTC  
CGTGAAATCTCCGGCGTGGAAGATCGGTTCAACGCCTCCCTGGGCACATAACCAG  
ATCTGCTGAAAATTATCAAGGACAAGGACTTCCTGGACAATGAGGAAAACGAGGAC  
ATTCTGGAAGATATCGTGCTGACCCTGACACTGTTTGAGGACAGAGAGATGATCGA  
GGAACGGCTGAAAACCTATGCCACCTGTTTCGACGACAAAGTGATGAAGCAGCTGA  
AGCGGCGGAGATACACCGGCTGGGGCAGGCTGAGCCGGAAGCTGATCAACGGCATC  
CGGGACAAGCAGTCCGGCAAGACAATCCTGGATTTCTGAAGTCCGACGGCTTCGC  
CAACAGAACTTCATGCAGCTGATCCACGACGACAGCCTGACCTTTAAAGAGGACA  
TCCAGAAAGCCAGGTGTCCGGCCAGGGCGATAGCCTGCACGAGCACATTGCCAAT  
CTGGCCGGCAGCCCCGCCATTAAGAAGGGCATCCTGCAGACAGTGAAGGTGGTGG  
CGAGCTCGTGAAAGTGATGGGCCGGCACAAGCCCGAGAACATCGTGATCGAAATGG  
CCAGAGAGAACCAGACCACCCAGAAGGGACAGAAGAACAGCCGCGAGAGAATGAA  
GCGGATCGAAGAGGGCATCAAAGAGCTGGGCAGCCAGATCCTGAAAGAACACCCC  
GTGGAAAACACCCAGCTGCAGAACGAGGCCCTGTACCTGTACTACCTGCAGAATGG  
GCGGGATATGTACGTGGACCAGGAAGTGGACATCAACCGGCTGTCCGACTACGATG  
TGGACCATATCGTGCCTCAGAGCTTTCTGAAGGACGACTCCATCGACAACAAGGTGC  
TGACCAGAAGCGACAAGAACCGGGGCAAGAGCGACAACGTGCCCTCCGAAGAGGT  
CGTGAAGAAGATGAAGAACTACTGGCGGCAGCTGCTGAACGCCAAGCTGATTACCC  
AGAGAAAGTTCGACAATCTGACCAAGGCCGAGAGAGGCCGGCCTGAGCGAACTGGAT  
AAGGCCGGCTTCATCAAGAGACAGCTGGTGGAAACCCGGCAGATCACAAAGCACGT  
GGCACAGATCCTGGACTCCCGGATGAACACTAAGTACGACGAGAATGACAAGCTGA  
TCCGGGAAGTGAAAGTGATCACCTGAAGTCCAAGCTGGTGTCCGATTTCCGGAAG  
GATTTCCAGTTTTACAAAGTGCGCGAGATCAACAACCTACCACCGCCACGACGCC  
TACCTGAACGCCGTCGTGGGAACCGCCCTGATCAAAAAGTACCCTGGCTGGAAAG  
CGAGTTCGTGTACGGCGACTACAAGGTGTACGACGTGCGGAAGATGATCGCCAAGA  
GCGAGCAGGAAATCGGCAAGGCTACCGCCAAGTACTTCTTCTACAGCAACATCATG  
AACTTTTTCAAGACCGAGATTACCCTGGCCAACGGCGAGATCCGGAAGCGCCTCT  
GATCGAGACAAACGGCGAAACCGGGGAGATCGTGTGGGATAAGGGCCGGGATTTTG  
CCACCGTGCGGAAAGTGCTGAGCATGCCCCAAGTGAATATCGTGAAAAAGACCGAG  
GTGCAGACAGGCGGCTTCAGCAAAGAGTCTATCCTGCCAAGAGGAACAGCGATAA  
GCTGATCGCCAGAAAGAAGGACTGGGACCCTAAGAAGTACGGCGGCTTCGACAGCC  
CCACCGTGGCCTATTCTGTGCTGGTGGTGGCCAAAGTGGAAAAGGGCAAGTCCAAG  
AAACTGAAGAGTGTGAAAGAGCTGCTGGGGATCACCATCATGGAAAGAAGCAGCTT  
CGAGAAGAATCCCATCGACTTTCTGGAAGCCAAGGGCTACAAAGAAGTGAAAAAGG  
ACCTGATCATCAAGCTGCCTAAGTACTCCCTGTTTCGAGCTGGAAAACGGCCGGAAG  
AGAATGCTGGCCTCTGCCGGCGAACTGCAGAAGGGAAACGAACTGGCCCTGCCCTC  
CAAATATGTGAACTTCCTGTACCTGGCCAGCCACTATGAGAAGCTGAAGGGCTCCCC  
CGAGGATAATGAGCAGAAACAGCTGTTTGTGGAACAGCACAAGCACTACCTGGACG  
AGATCATCGAGCAGATCAGCGAGTTCTCCAAGAGAGTGATCCTGGCCGACGCTAAT

CTGGACAAAGTGCTGTCCGCCTACAACAAGCACCGGGATAAGCCCATCAGAGAGCA  
GGCCGAGAATATCATCCACCTGTTTACCCTGACCAATCTGGGAGCCCCTGCCGCCTT  
CAAGTACTTTGACACCACCATCGACCGGAAGAGGTACACCAGCACCAAAGAGGTGC  
TGGACGCCACCCTGATCCACCAGAGCATCACCGGCCTGTACGAGACACGGATCGAC  
CTGTCTCAGCTGGGAGGGCGACAAAAGGCCGGCGGCCACGAAAAGGCCGGCCAGG  
CAAAAAGAAAAAG

eSpCas9(1.1)

ATGGACTATAAGGACCACGACGGAGACTACAAGGATCATGATATTGATTACAAAGA  
CGATGACGATAAGATGGCCCCAAAGAAGAAGCGGAAGGTTCGGTATCCACGGAGTCC  
CAGCAGCCGACAAGAAGTACAGCATCGGCCTGGACATCGGCACCAACTCTGTGGGC  
TGGGCCGTGATCACCGACGAGTACAAGGTGCCAGCAAGAAATTCAAGGTGCTGGG  
CAACACCGACCGGCACAGCATCAAGAAGAACCTGATCGGAGCCCTGCTGTTTCGACA  
GCGGCGAAACAGCCGAGGCCACCCGGCTGAAGAGAACCGCCAGAAGAAGATACAC  
CAGACGGAAGAACCGGATCTGCTATCTGCAAGAGATCTTCAGCAACGAGATGGCCA  
AGGTGGACGACAGCTTCTTCCACAGACTGGAAGAGTCCTTCTTGGTGGAGAGGAT  
AAGAAGCACGAGCGGCACCCCATCTTCGGCAACATCGTGGACGAGGTGGCCTACCA  
CGAGAAGTACCCACCATCTACCACCTGAGAAAGAACTGGTGGACAGCACCGACA  
AGGCCGACCTGCGGCTGATCTATCTGGCCCTGGCCACATGATCAAGTTCCGGGGCC  
ACTTCTGATCGAGGGCGACCTGAACCCCGACAACAGCGACGTGGACAAGCTGTTC  
ATCCAGCTGGTGCAGACCTACAACCAGCTGTTCGAGGAAAACCCCATCAACGCCAG  
CGGCGTGGACGCCAAGGCCATCCTGTCTGCCAGACTGAGCAAGAGCAGACGGCTGG  
AAAATCTGATCGCCAGCTGCCCGGCGAGAAGAAGAATGGCCTGTTTCGGAAACCTG  
ATTGCCCTGAGCCTGGGCCTGACCCCAACTTCAAGAGCAACTTCGACCTGGCCGAG  
GATGCCAAACTGCAGCTGAGCAAGGACACCTACGACGACGACCTGGACAACCTGCT  
GGCCAGATCGGCGACCAGTACGCCGACCTGTTTCTGGCCGCCAAGAACCTGTCCG  
ACGCCATCCTGCTGAGCGACATCCTGAGAGTGAACACCGAGATCACCAAGGCCCCC  
CTGAGCGCCTCTATGATCAAGAGATACGACGAGCACCACCAGGACCTGACCCTGCT  
GAAAGCTCTCGTGCGGCAGCAGCTGCCTGAGAAGTACAAAGAGATTTTCTTCGACC  
AGAGCAAGAACGGCTACGCCGGCTACATTGACGGCGGAGCCAGCCAGGAAGAGTTC  
TACAAGTTCATCAAGCCCATCCTGGAAAAGATGGACGGCACCCGAGGAACCTGCTCGT  
GAAGCTGAACAGAGAGGACCTGCTGCGGAAGCAGCGGACCTTCGACAACGGCAGC  
ATCCCCCACCAGATCCACCTGGGAGAGCTGCACGCCATTCTGCGGCGGCAGGAAGA  
TTTTTACCATTCTGAAGGACAACCGGGAAAAGATCGAGAAGATCCTGACCTTCCG  
CATCCCCTACTACGTGGGCCCTCTGGCCAGGGGAAAACAGCAGATTCGCCTGGATGA  
CCAGAAAGAGCGAGGAACCATCACCCCTGGAACCTTCGAGGAAGTGGTGGACAA  
GGGCGCTTCCGCCAGAGCTTCATCGAGCGGATGACCAACTTCGATAAGAACCTGC  
CCAACGAGAAGGTGCTGCCAAGCACAGCCTGCTGTACGAGTACTTCACCGTGTAT  
AACGAGCTGACCAAAGTGAAATACGTGACCGAGGGAATGAGAAAGCCCGCCTTCTCT  
GAGCGGCGAGCAGAAAAGGCCATCGTGGACCTGCTGTTCAAGACCAACCGGAAA  
GTGACCGTGAAGCAGCTGAAAGAGGACTACTTCAAGAAAATCGAGTGCTTCGACTC  
CGTGGAATCTCCGGCGTGGAAGATCGGTTCAACGCCTCCCTGGGCACATAACCAG  
ATCTGCTGAAAATTATCAAGGACAAGGACTTCTGGACAATGAGGAAAACGAGGAC  
ATTCTGGAAGATATCGTGCTGACCCTGACACTGTTTGAGGACAGAGAGATGATCGA  
GGAACGGCTGAAAACCTATGCCACCTGTTTCGACGACAAAGTGATGAAGCAGCTGA  
AGCGGCGGAGATACACCGGCTGGGGCAGGCTGAGCCGGAAGCTGATCAACGGCATC

CGGGACAAGCAGTCCGGCAAGACAATCCTGGATTTCTGAAGTCCGACGGCTTCGC  
CAACAGAACTTCATGCAGCTGATCCACGACGACAGCCTGACCTTTAAAGAGGACA  
TCCAGAAAGCCCAGGTGTCCGGCCAGGGCGATAGCCTGCACGAGCACATTGCCAAT  
CTGGCCGGCAGCCCCGCCATTAAGAAGGGCATCCTGCAGACAGTGAAGGTGGTGGA  
CGAGCTCGTGAAAGTGATGGGCCGGCACAAGCCCCGAGAACATCGTGATCGAAATGG  
CCAGAGAGAACCAGACCACCCAGAAGGGACAGAAGAACAGCCGCGAGAGAATGAA  
GCGGATCGAAGAGGGCATCAAAGAGCTGGGCAGCCAGATCCTGAAAGAACACCCC  
GTGGAAAACACCCAGCTGCAGAACGAGAAGCTGTACCTGTACTACCTGCAGAATGG  
GCGGGATATGTACGTGGACCAGGAAGTGGACATCAACCGGCTGTCCGACTACGATG  
TGGACCATATCGTGCCTCAGAGCTTTCTGCGGACGACTCCATCGACAACAAGGTGC  
TGACCAGAAGCGACAAGAACCGGGGCAAGAGCGACAACGTGCCCTCCGAAGAGGT  
CGTGAAGAAGATGAAGAAGTACTGGCGGCAGCTGCTGAACGCCAAGCTGATTACCC  
AGAGAAAGTTCGACAATCTGACCAAGGCCGAGAGAGGGCGCCTGAGCGAACTGGAT  
AAGGCCGGCTTCATCAAGAGACAGCTGGTGGAAACCCGGCAGATCACAAAGCACGT  
GGCACAGATCCTGGACTCCCGGATGAACACTAAGTACGACGAGAATGACAAGCTGA  
TCCGGGAAGTGAAAGTGATCACCTGAAGTCCAAGCTGGTGTCCGATTTCCGGAAG  
GATTTCCAGTTTTACAAAGTGC GCGAGATCAACA ACTACCACCGCCACGACGCC  
TACCTGAACGCCGTCGTGGGAACCGCCCTGATCAAAAAGTACCCTGCGCTGGAAAG  
CGAGTTCGTGTACGGCGACTACAAGGTGTACGACGTGCGGAAGATGATCGCCAAGA  
GCGAGCAGGAAATCGGCAAGGCTACCGCCAAGTACTTCTTCTACAGCAACATCATG  
AACTTTTTCAAGACCGAGATTACCCTGGCCAACGGCGAGATCCGGAAGCGCCTCT  
GATCGAGACAAACGGCGAAACCGGGGAGATCGTGTGGGATAAGGGCCGGGATTTTG  
CCACCGTGCGGAAAGTGCTGAGCATGCCCAAGTGAATATCGTGAAAAAGACCGAG  
GTGCAGACAGGCGGCTTCAGCAAAGAGTCTATCCTGCCCAAGAGGAACAGCGATAA  
GCTGATCGCCAGAAAGAAGGACTGGGACCCTAAGAAGTACGGCGGCTTCGACAGCC  
CCACCGTGGCCTATTCTGTGCTGGTGGTGGCCAAAGTGGAAAAGGGCAAGTCCAAG  
AACTGAAGAGTGTGAAAGAGCTGCTGGGGATCACCATCATGGAAAGAAGCAGCTT  
CGAGAAGAATCCCATCGACTTTCTGGAAGCCAAGGGCTACAAAGAAGTGAAAAAGG  
ACCTGATCATCAAGCTGCCTAAGTACTCCCTGTTCTGAGCTGGAAAACGGCCGGAAG  
AGAATGCTGGCCTCTGCCGGCGAACTGCAGAAGGGAAACGAACTGGCCCTGCCCTC  
CAAATATGTGAACTTCCTGTACCTGGCCAGCCACTATGAGAAGCTGAAGGGCTCCCC  
CGAGGATAATGAGCAGAAACAGCTGTTTGTGGAACAGCACAAGCACTACCTGGACG  
AGATCATCGAGCAGATCAGCGAGTTCTCCAAGAGAGTGATCCTGGCCGACGCTAAT  
CTGGACAAAGTGCTGTCCGCCTACAACAAGCACCGGGATAAGCCCATCAGAGAGCA  
GGCCGAGAATATCATCCACCTGTTTACCCTGACCAATCTGGGAGCCCCTGCCGCCTT  
CAAGTACTTTGACACCACCATCGACCGGAAGAGGTACACCAGCACCAAAGAGGTGC  
TGGACGCCACCCTGATCCACCAGAGCATACCGGCCTGTACGAGACACGGATCGAC  
CTGTCTCAGCTGGGAGGCGACAAAAGGCCGGCGGCCACGAAAAGGCCGGCCAGG  
CAAAAAGAAAAAGTAA

## SUPPLEMENTARY REFERENCES

1. M. Kearse *et al.*, Geneious Basic: an integrated and extendable desktop software platform for the organization and analysis of sequence data. *Bioinformatics* **28**, 1647-1649 (2012).
2. C. Engler, R. Gruetzner, R. Kandzia, S. Marillonnet, Golden gate shuffling: a one-pot DNA shuffling method based on type II restriction enzymes. *PLoS One* **4**, e5553 (2009).
3. P. D. Hsu *et al.*, DNA targeting specificity of RNA-guided Cas9 nucleases. *Nat Biotechnol* **31**, 827-832 (2013).
4. N. Crosetto *et al.*, Nucleotide-resolution DNA double-strand break mapping by next-generation sequencing. *Nat Meth* **10**, 361-365 (2013).
5. F. A. Ran *et al.*, In vivo genome editing using *Staphylococcus aureus* Cas9. *Nature* **520**, 186-191 (2015).
6. H. Nishimasu *et al.*, Crystal structure of Cas9 in complex with guide RNA and target DNA. *Cell* **156**, 935-949 (2014).
7. C. Anders, O. Niewoehner, A. Duerst, M. Jinek, Structural basis of PAM-dependent target DNA recognition by the Cas9 endonuclease. *Nature* **513**, 569-573 (2014).
